# Supplementary material for: RAFT polymerization of fatty acid containing monomers: controlled synthesis of polymers from renewable resources
Source: Royal Society of Chemistry journal article supplement (doi:10.1039/c3ra45541f), 2013-01-01
Supplement: c3ra45541f.pdf [file c3ra45541f.pdf]

## Supporting Information

### RAFT Polymerization of Fatty Acid Containing Monomers: Controlled Synthesis of Polymers from Renewable Resources

Binoy Maiti and Priyadarsi De \*

Polymer Research Centre, Department of Chemical Sciences, Indian Institute of Science  
Education and Research-Kolkata, PO: BCKV Campus, Mohanpur - 741252, Nadia, West  
Bengal, India.

**Table S1** Synthesis of various fatty acid based monomers.

| Monomer | Yield (%) | Physical state | Actual mass [M + Na <sup>+</sup> ] | Mass found [M + Na <sup>+</sup> ] |
|---------|-----------|----------------|------------------------------------|-----------------------------------|
| CLAMA   | 75        | solid          | 279.17                             | 279.32                            |
| CRAMA   | 76        | liquid         | 307.20                             | 307.29                            |
| LAMA    | 80        | liquid         | 335.23                             | 335.27                            |
| MAMA    | 85        | liquid         | 363.26                             | 363.28                            |
| PAMA    | 77        | solid          | 391.29                             | 391.27                            |
| SAMA    | 74        | liquid         | 419.32                             | 419.28                            |



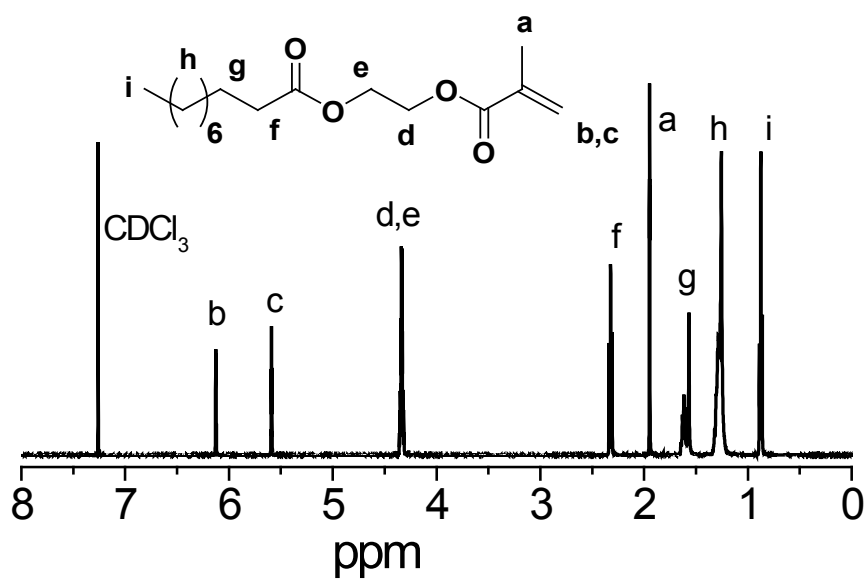

**Fig. S3** <sup>1</sup>H NMR spectrum of CRAMA in CDCl<sub>3</sub>.

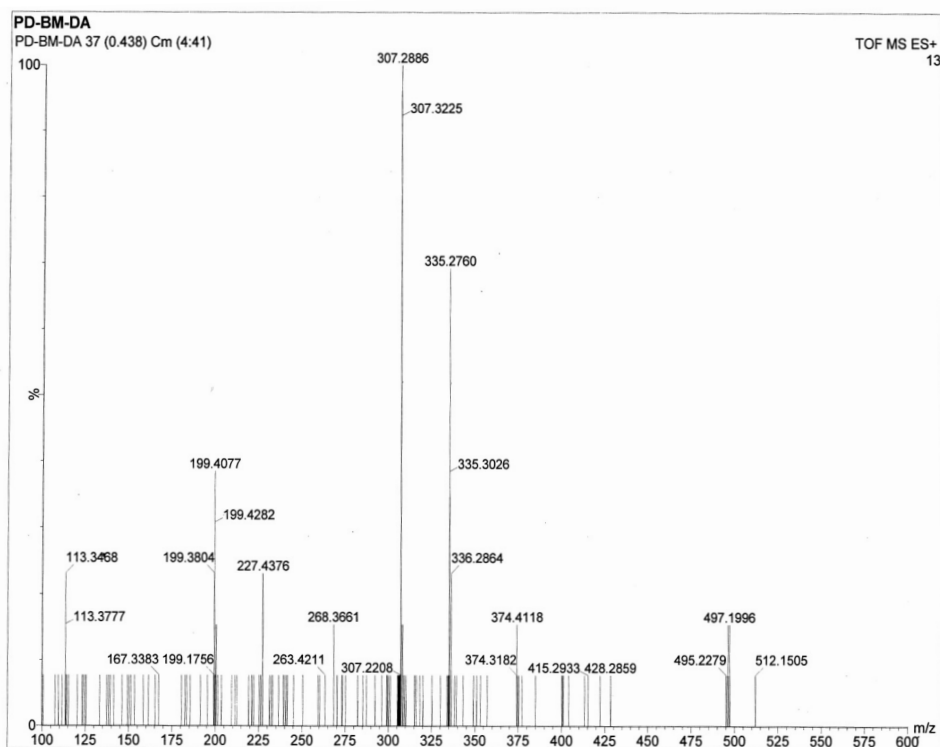

**Fig. S4** ESI-MS spectrum of CRAMA (calculated  $m/z$  for  $[M + Na^+]$ : 307.20, observed: 307.29).

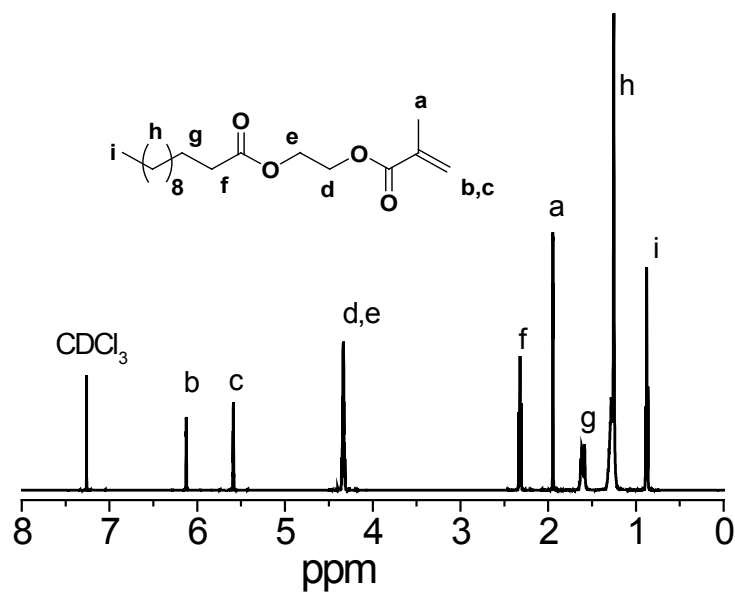

Fig. S5 <sup>1</sup>H NMR spectrum of LAMA in CDCl<sub>3</sub>.

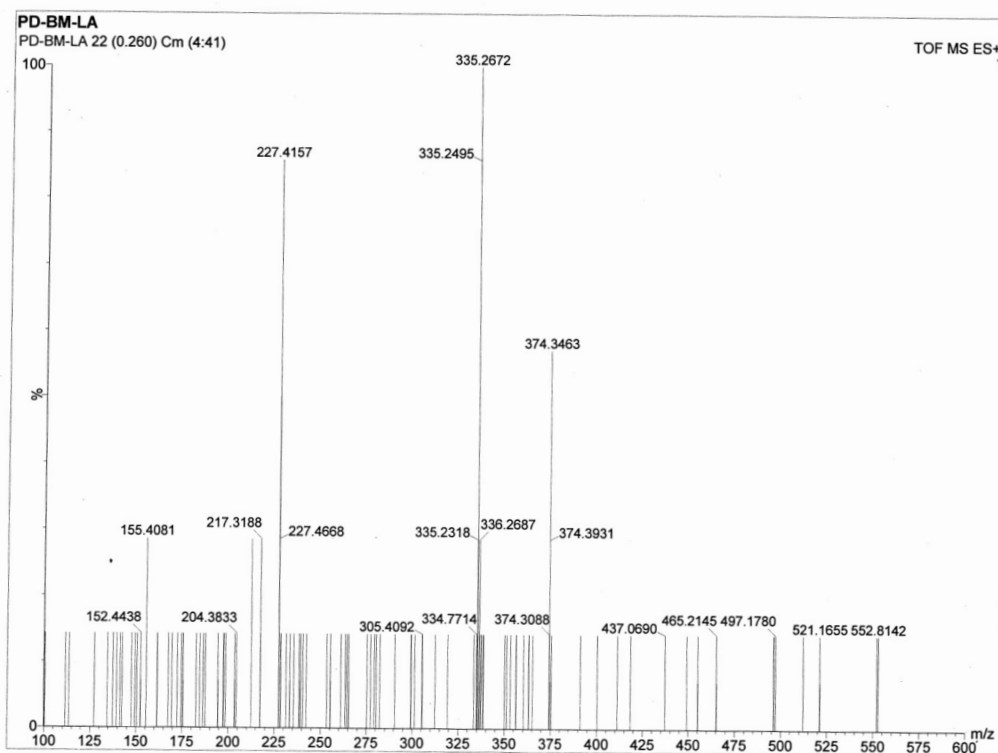

Fig. S6 ESI-MS spectrum of LAMA (calculated  $m/z$  for  $[M + Na^+]$ : 335.23, observed: 335.26).

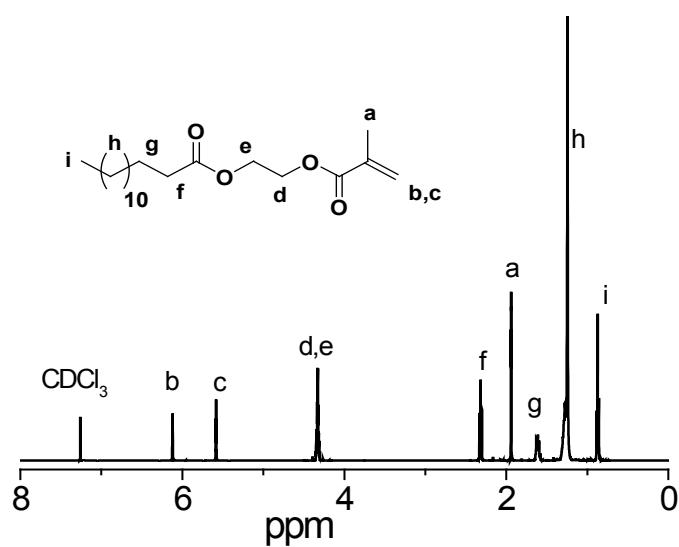

**Fig. S7**  $^1\text{H}$  NMR spectrum of MAMA in  $\text{CDCl}_3$ .

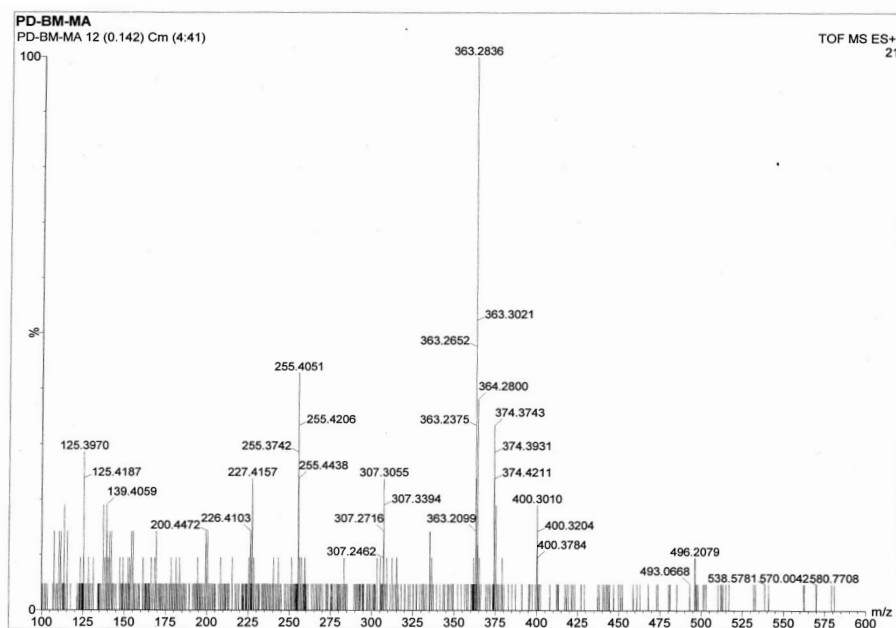

**Fig. S8** ESI-MS spectrum of MAMA (calculated  $m/z$  for  $[\text{M} + \text{Na}^+]$ : 363.26, observed: 363.28).

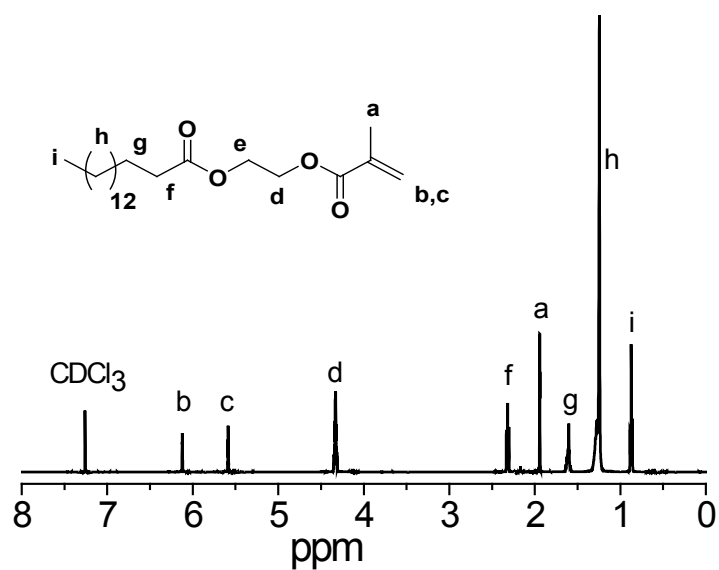

**Fig. S9** <sup>1</sup>H NMR spectrum of PAMA in CDCl<sub>3</sub>.

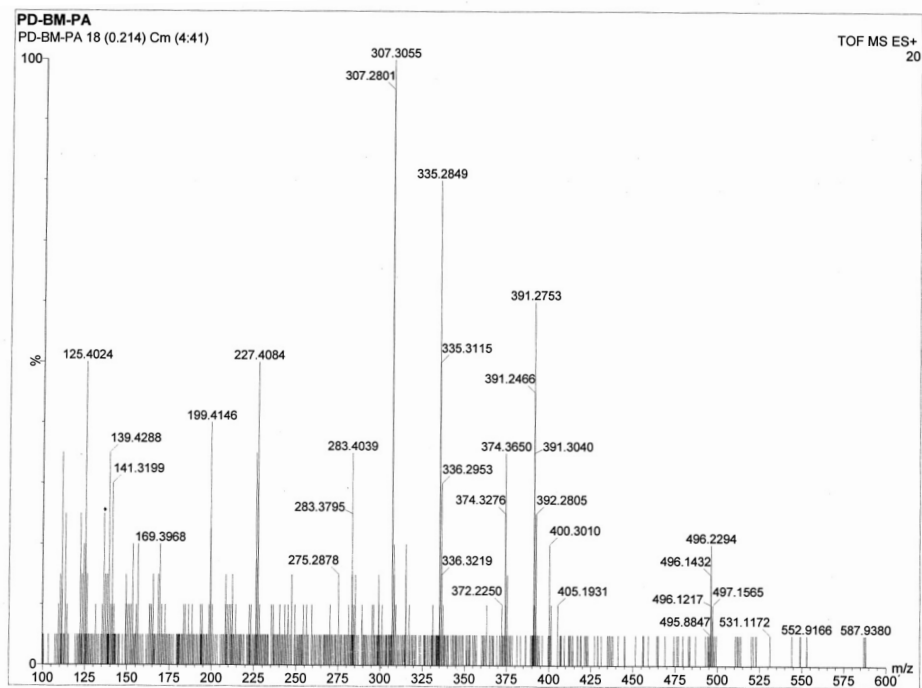

**Fig. S10** ESI-MS spectrum of PAMA (calculated  $m/z$  for  $[M + Na^+]$ : 391.29, observed: 391.28).

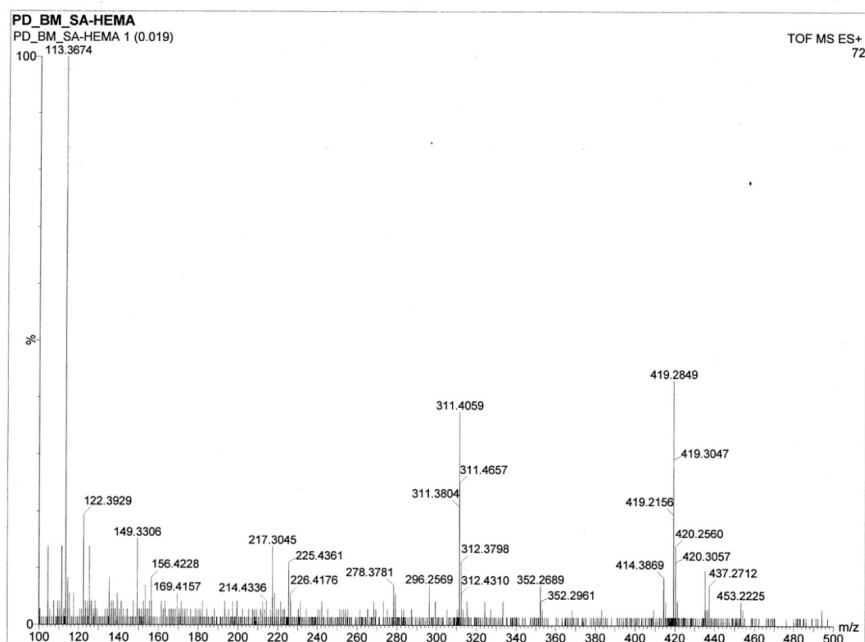

**Fig. S11** ESI-MS spectrum of SAMA (calculated  $m/z$  for  $[M + Na^+]$ : 419.32, observed: 419.28).

**Table S2** Solubility of fatty acid based monomer and polymer at room temperature.

| Solvent          | CLAMA | PCLAMA | SAMA | PSAMA |
|------------------|-------|--------|------|-------|
| Water            | -     | -      | -    | -     |
| Acetone          | +     | +      | +    | -     |
| Chloroform       | +     | +      | +    | +     |
| DCM              | +     | +      | +    | +     |
| CCl <sub>4</sub> | +     | +      | +    | +     |
| Methanol         | +     | -      | +    | -     |
| Ethanol          | +     | -      | +    | -     |
| DMF              | +     | +      | +    | -     |
| DMSO             | +     | +      | +    | -     |
| THF              | +     | +      | +    | +     |
| Pet ether        | +     | +      | +    | +     |
| Diethyl ether    | +     | +      | +    | +     |
| Ethyl acetate    | +     | +      | +    | +     |
| Hexane           | +     | +      | +    | +     |
| Benzene          | +     | +      | +    | +     |
| Toluene          | +     | +      | +    | +     |
| 1,4-dioxane      | +     | +      | +    | +     |
| Acetonitrile     | +     | -      | +    | -     |

The symbols (+) and (-) indicate soluble and insoluble, respectively.

**Table S3** Polymerization of various FAMA's in DMF at 70 °C using CDP as CTA.<sup>a</sup>

| Monomer | Conv. <sup>b</sup><br>(%) | $M_{n,GPC}$ <sup>c</sup><br>(g/mol) | PDI <sup>c</sup> | $M_{n,theo}$ <sup>d</sup><br>(g/mol) |
|---------|---------------------------|-------------------------------------|------------------|--------------------------------------|
| CLAMA   | 72                        | 16300                               | 1.06             | 9600                                 |
| LAMA    | 75                        | 15000                               | 1.13             | 12100                                |
| PAMA    | 71                        | 14700                               | 1.09             | 13500                                |
| SAMA    | 35                        | 15100                               | 1.17             | 7600                                 |

<sup>a</sup> [Monomer]/[CDP]/[AIBN] = 50/1/0.2; time = 4 h. <sup>b</sup> Determined by gravimetric analysis. <sup>c</sup> Measured by GPC using PMMA standards in THF. <sup>d</sup> Theoretical molecular weight ( $M_{n,theo}$ ) = ([FAMA]/[CTA] × MW of FAMA × conversion) + (MW of CDP).

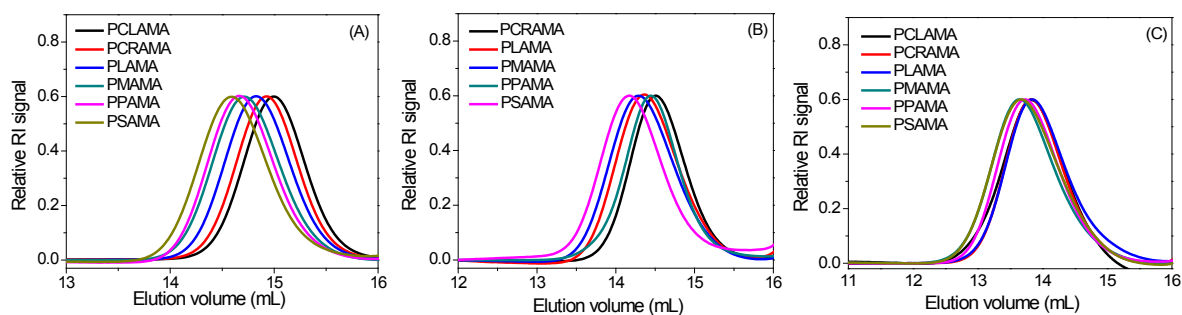

**Fig. S12** GPC RI traces of various polymers obtained at different [M]/[CDP]/[AIBN] ratios; (A) 25:1:0.2, (B) 50:1:0.2 and (C) 100:1:0.2 for the RAFT polymerization of FAMA's in THF at 70 °C.



**Table S4** Polymerization of various FAMA in THF at 70 °C using CDP as CTA.

| Polymer | [M]/[CDP]/[AIBN] | Time (h) | Conv. <sup>a</sup> (%) | $M_{n,GPC}^b$ (g/mol) | PDI <sup>b</sup> | $M_{n,theo}^c$ (g/mol) |
|---------|------------------|----------|------------------------|-----------------------|------------------|------------------------|
| PCLAMA  | 25:1:0.2         | 6.5      | 78                     | 7500                  | 1.10             | 5400                   |
| PCLAMA  | 100:1:0.2        | 7.5      | 80                     | 25300                 | 1.28             | 20900                  |
| PLAMA   | 25:1:0.2         | 6.5      | 78                     | 9600                  | 1.11             | 6500                   |
| PLAMA   | 100:1:0.2        | 7.5      | 87                     | 22400                 | 1.30             | 27500                  |
| PMAMA   | 25:1:0.2         | 6.5      | 81                     | 10700                 | 1.11             | 7300                   |
| PMAMA   | 100:1:0.2        | 7.5      | 80                     | 27400                 | 1.34             | 27600                  |
| PPAMA   | 25:1:0.2         | 6.5      | 84                     | 10900                 | 1.12             | 8200                   |
| PPAMA   | 100:1:0.2        | 7.5      | 73                     | 26100                 | 1.28             | 27300                  |

<sup>a</sup>Determined by gravimetric analysis. <sup>b</sup>Measured by GPC using PMMA standards in THF.

<sup>c</sup> $M_{n,theo} = ([FAMA]/[CDP] \times MW \text{ of FAMA} \times conv.) + MW \text{ of CDP}.$

**Table S5** Polymerization of various FAMA in THF at 70 °C using CTP as CTA.<sup>a</sup>

| Monomer | Conv. <sup>b</sup> (%) | $M_{n,GPC}^c$ (g mol <sup>-1</sup> ) | PDI <sup>c</sup> | $M_{n,NMR}^d$ (g mol <sup>-1</sup> ) | $M_{n,theo}^e$ (g mol <sup>-1</sup> ) |
|---------|------------------------|--------------------------------------|------------------|--------------------------------------|---------------------------------------|
| CLAMA   | 72                     | 9000                                 | 1.09             | 9200                                 | 9500                                  |
| CRAMA   | 78                     | 15230                                | 1.10             | 21000                                | 11400                                 |
| LAMA    | 75                     | 15600                                | 1.14             | ND                                   | 12000                                 |
| MAMA    | 81                     | 16100                                | 1.12             | 16000                                | 14100                                 |
| PAMA    | 79                     | 19260                                | 1.11             | ND                                   | 14800                                 |
| SAMA    | 83                     | 19750                                | 1.11             | 14980                                | 17300                                 |

<sup>a</sup> Molar ratio of [Monomer]/[CTP]/[AIBN] = 50/1/0.2, Time = 7 h; <sup>b</sup> Determined by gravimetric analysis. <sup>c</sup> Measured by GPC using PMMA standards in THF. <sup>d</sup> Calculated by <sup>1</sup>H NMR study. <sup>e</sup>  $M_{n,theo} = ([FAMA]/[CTP] \times MW \text{ of FAMA} \times conversion) + MW \text{ of CTP}.$

**Table S6** Block copolymerization with various PFAMA macro-CTAs at 70 °C in THF.<sup>a</sup>

| Block copolymers                       | macro CTA | Conv. <sup>b</sup><br>(%) | $M_{n,GPC}$ <sup>c</sup><br>(g/mol) | PDI <sup>c</sup> | $M_{n,theo}$ <sup>d</sup><br>(g/mol) | $M_{n,NMR}$ <sup>e</sup><br>(g/mol) |
|----------------------------------------|-----------|---------------------------|-------------------------------------|------------------|--------------------------------------|-------------------------------------|
| PCLAMA- <i>b</i> -PCLAMA               | PCLAMA    | 64                        | 14300                               | 1.23             | 11600                                | ND <sup>f</sup>                     |
| PCLAMA- <i>b</i> -PMEO <sub>2</sub> MA | PCLAMA    | 70                        | 13500                               | 1.15             | 12700                                | 15700                               |
| PLAMA- <i>b</i> -PLAMA                 | PLAMA     | 90                        | 14100                               | 1.18             | 16600                                | 16000                               |
| PLAMA- <i>b</i> -PMEO <sub>2</sub> MA  | PLAMA     | 52                        | 13000                               | 1.16             | 13500                                | 10000                               |
| PPAMA- <i>b</i> -PPAMA                 | PPAMA     | 80                        | 15900                               | 1.16             | 18200                                | 19900                               |
| PPAMA- <i>b</i> -PMEO <sub>2</sub> MA  | PPAMA     | 53                        | 14200                               | 1.15             | 14800                                | 19400                               |

<sup>a</sup>Molar ratio of [Monomer]/[macro CTA]/[AIBN] = 25/1/0.2, time = 7 h. <sup>b</sup>Determined by gravimetric analysis. <sup>c</sup>Measured by GPC. <sup>d</sup>Theoretical  $M_n$ . <sup>e</sup>Obtained from <sup>1</sup>H NMR chain end analysis. <sup>f</sup>Not determined.

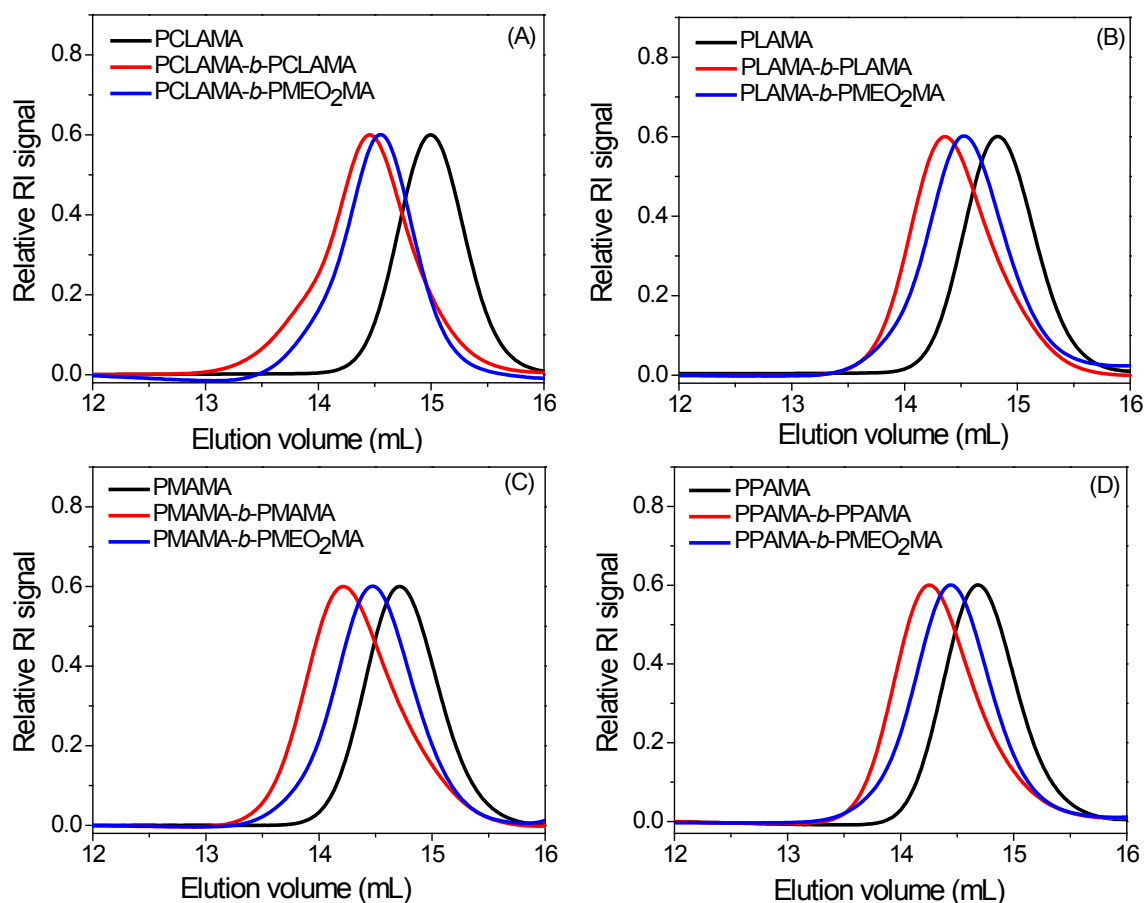

**Fig. S13** GPC RI traces of the (A) PCLAMA-macroCTA, chain extended PCLAMA-*b*-PCLAMA and block copolymer PCLAMA-*b*-PMEO<sub>2</sub>MA; (B) PLAMA-macroCTA, chain extended PLAMA-*b*-PLAMA and block copolymer PLAMA-*b*-PMEO<sub>2</sub>MA; (C) PMAMA-macroCTA, chain extended PMAMA-*b*-PMAMA and block copolymer PMAMA-*b*-PMEO<sub>2</sub>MA; and (D) PPAMA-macroCTA, chain extended PPAMA-*b*-PPAMA and block copolymer PPAMA-*b*-PMEO<sub>2</sub>MA.
